# Supplementary material for: DFT study on hydroxy acid–lactone interconversion of statins: the case of atorvastatin
Source: Royal Society of Chemistry journal article supplement (doi:10.1039/b803342k), 2008-01-01
Supplement: b803342k.pdf [file b803342k.pdf]

Table S1. Relative energies (in kcal/mol) calculated for ATV species present during lactonisation/hydrolysis under acidic conditions in vacuo and in aqueous solution.

| Structure | Relative energy B3LYP /6-31+g(d) (isolated) | Hydratation free energy SM5.4A | Hydratation free energy SM5.4P | Relative energy B3LYP & SM5.4A (aqueous) | Relative energy B3LYP & SM5.4P (aqueous) |
|-----------|---------------------------------------------|--------------------------------|--------------------------------|------------------------------------------|------------------------------------------|
| I         | 0.0                                         | -8.8                           | -12.9                          | 0.0                                      | 0.0                                      |
| A_AL2     | 4.1                                         | -10.0                          | -14.1                          | 2.8                                      | 2.9                                      |
| A_AL1     | 11.3                                        | -9.5                           | -12.9                          | 10.6                                     | 11.4                                     |
| TS        | 16.5                                        | -9.1                           | -11.7                          | 16.3                                     | 17.8                                     |
| AL2       | 35.8                                        | -10.1                          | -13.6                          | 34.5                                     | 35.1                                     |
| AL1       | 37.8                                        | -9.2                           | -13.0                          | 37.3                                     | 37.7                                     |
| II        | 6.0                                         | -8.4                           | -12.4                          | 6.4                                      | 6.5                                      |
| TS1_eq    | 6.2                                         | -8.4                           | -12.4                          | 6.6                                      | 6.8                                      |
| TS1_ax    | 8.8                                         | -8.5                           | -12.3                          | 9.1                                      | 9.4                                      |
| III_eq    | 5.1                                         | -8.9                           | -12.7                          | 5.0                                      | 5.2                                      |
| III_ax    | 6.1                                         | -9.3                           | -13.2                          | 5.6                                      | 5.9                                      |
| TS2_eq    | 5.9                                         | -10.3                          | -14.4                          | 4.4                                      | 4.4                                      |
| TS2_ax    | 18.4                                        | -11.2                          | -15.7                          | 16.0                                     | 15.7                                     |
| IV_eq     | 4.5                                         | -10.4                          | -14.7                          | 2.9                                      | 2.7                                      |
| IV_ax     | 5.7                                         | -9.6                           | -13.8                          | 4.8                                      | 4.8                                      |
| TS3_eq    | 25.1                                        | -9.4                           | -13.1                          | 24.5                                     | 24.9                                     |
| TS3_ax    | 18.7                                        | -9.2                           | -12.4                          | 18.3                                     | 19.2                                     |
| L_AL2     | -1.7                                        | -8.7                           | -11.0                          | -1.6                                     | 0.3                                      |
| L_AL1     | -4.2                                        | -9.3                           | -12.8                          | -4.7                                     | -4.1                                     |
| V_eq      | -1.7                                        | -8.7                           | -11.0                          | -1.6                                     | 0.3                                      |
| V_ax      | -4.2                                        | -9.3                           | -12.8                          | -4.7                                     | -4.1                                     |

(B3LYP/6-31+G(d) energy baseline -2053.9435098 Hartree)

Table S2. Relative energies (in kcal/mol) calculated for ATV species present during lactonisation/hydrolysis under basic conditions in vacuo and in aqueous solution.

| Structure | Relative energy B3LYP /6-31+g(d) (isolated) | Hydratation free energy SM5.4A | Hydratation free energy SM5.4P | Relative energy B3LYP & SM5.4A (aqueous) | Relative energy B3LYP & SM5.4P (aqueous) |
|-----------|---------------------------------------------|--------------------------------|--------------------------------|------------------------------------------|------------------------------------------|
|           | 0.0                                         | -48.8                          | -53.0                          | 0.0                                      | 0.0                                      |
|           | 23.9                                        | -44.8                          | -50.2                          | 27.9                                     | 26.8                                     |
|           | 22.9                                        | -47.9                          | -53.5                          | 23.8                                     | 22.4                                     |
|           | 26.9                                        | -52.9                          | -57.8                          | 22.8                                     | 22.1                                     |
|           | 21.0                                        | -51.7                          | -58.1                          | 18.1                                     | 15.9                                     |

(B3LYP/6-31+G(d) energy baseline -1940,08620928 Hartree)
